# Supplementary material for: Primary spinal pilocytic astrocytoma: clinical study with long-term follow-up in 16 patients and a literature review
Source: Springer Nature journal article supplement (doi:10.1007/s10143-019-01109-0), 2019-05-16
Supplement: MOESM4 [file 16728812]

Supplementary Table 2. Studies from literature included in final analysis (n=47)

| **Studies included** | **Year of publication** | **No. of patients included** |
| --- | --- | --- |
| Miyata et al [12] | 2018 | 1 |
| Bell et al [1] | 2018 | 1 |
| Rangwala et al [17] | 2017 | 1 |
| Harraher et al [7] | 2013 | 1 |
| Choi et al [2] | 2012 | 4 |
| Ebner et al [5] | 2012 | 3 |
| Lim et al [10] | 2012 | 1 |
| Karikari et al [9] | 2011 | 5 |
| Paixao-becker et al [16] | 2010 | 2 |
| Colnat-Coulbois [3] | 2010 | 1 |
| Tobias et al [19] | 2008 | 2 |
| Ogden et al [15] | 2008 | 1 |
| White et al [20] | 2007 | 5 |
| David et al [4] | 2006 | 1 |
| Sandalcioglu et al [18] | 2002 | 1 |
| Hassall et al [8] | 2001 | 2 |
| Ng et al [13] | 2001 | 1 |
| Merchant et al [11] | 2000 | 5 |
| Nishio et al [14] | 2000 | 4 |
| Epstein et al [6] | 1992 | 5 |

1. Bell E, Kanodia AK, Gunaratne B, Edgar A (2018) Leptomeningeal dissemination of spinal pilocytic astrocytoma: a rare entity. BMJ Case Rep 2018. doi:10.1136/bcr-2018-226955

2. Choi GH, Oh JK, Kim TY, You NK, Lee HS, Yoon DH, Ha Y, Yi S, Kim DS, Choi JU, Kim KN (2012) The clinical features and surgical outcomes of pediatric patients with primary spinal cord tumor. Childs Nerv Syst 28:897-904. doi:10.1007/s00381-012-1718-8

3. Colnat-Coulbois S, Klein O, Braun M, Thouvenot P, Marchal JC (2010) Management of intramedullary cystic pilocytic astrocytoma with rhenium-186 intracavitary irradiation: case report. Neurosurgery 66:E1023-1024; discussion E1024. doi:10.1227/01.NEU.0000367800.59074.C2

4. David M (2006) Localized cervical pruritus as the presenting symptom of a spinal cord tumor. Pediatric Emergency Care 22:746

5. Ebner FH, Schittenhelm J, Roser F, Scheel-Walter H, Tatagiba M, Schuhmann MU (2012) Management of holocord pilocytic astrocytomas in children and adolescents: an update. Pediatr Neurosurg 48:133-140. doi:10.1159/000345593

6. Epstein FJ, Farmer JP, Freed D, . (1992) Adult intramedullary astrocytomas of the spinal cord. Journal of Neurosurgery 77:355-359

7. Harraher CD, Vogel H, Steinberg GK (2013) Spinal pilocytic astrocytoma in an elderly patient. World Neurosurg 79:799 E797-799. doi:10.1016/j.wneu.2011.10.033

8. Hassall TEG, Mitchell AE, Ashley DM (2001) Carboplatin chemotherapy for progressive intramedullary spinal cord low-grade gliomas in children: Three case studies and a review of the literature. Neuro-Oncology 3:251

9. Karikari IO, Nimjee SM, Hodges TR, Cutrell E, Hughes BD, Powers CJ, Mehta AI, Hardin C, Bagley CA, Isaacs RE, Haglund MM, Friedman AH (2011) Impact of tumor histology on resectability and neurological outcome in primary intramedullary spinal cord tumors: a single-center experience with 102 patients. Neurosurgery 68:188-197; discussion 197. doi:10.1227/NEU.0b013e3181fe3794

10. Lim S, Lee SJ, Rhim SC (2012) Primary spinal cord astrocytoma presenting as intracranial hypertension: a case report. Korean Journal of Spine 9:272

11. Merchant TE, Kiehna EN, Thompson SJ, Heideman R, ., Sanford RA, Kun LE (2000) Pediatric low-grade and ependymal spinal cord tumors. Pediatric Neurosurgery 32:30-36

12. Miyata K, Hori T, Shimomura Y, Joko M, Takayasu M, Okumura A (2018) Pseudoprogression successfully treated with bevacizumab in a child with spinal pilocytic astrocytoma. Childs Nerv Syst 34:2305-2308. doi:10.1007/s00381-018-3841-7

13. Ng H-K, Leung CHS, Boet R, Poon W-S (2001) Spinal cord pilocytic astrocytoma with cranial meningeal metastases. Journal of Clinical Neuroscience 8:374-377. doi:10.1054/jocn.2000.0762

14. Nishio S, Morioka T, Fujii K, Inamura T, Fukui M (2000) Spinal cord gliomas: management and outcome with reference to adjuvant therapy. Journal of Clinical Neuroscience 7:20-23

15. Ogden AT, Feldstein NA, Mccormick PC (2008) Anterior approach to cervical intramedullary pilocytic astrocytoma. Case report. Journal of Neurosurgery Spine 9:253-257

16. Paixao Becker A, de Oliveira RS, Saggioro FP, Neder L, Chimelli LM, Machado HR (2010) In pursuit of prognostic factors in children with pilocytic astrocytomas. Childs Nerv Syst 26:19-28. doi:10.1007/s00381-009-0990-8

17. Rangwala SD, Oh G, Barks AL, Nikas DC (2017) Intramedullary Thoracic Spine Astrocytoma Presenting as Hydrocephalus in an Infant: A Case Report. Pediatr Neurosurg 52:327-330. doi:10.1159/000479323

18. Sandalcioglu IE, Gasser T, Wiedemayer H, Horsch S, Stolke D (2002) Favourable outcome after biopsy and decompression of a holocord intramedullary spinal cord astrocytoma in a newborn. European Journal of Paediatric Neurology 6:179-182. doi:10.1053/ejpn.2002.0587

19. Tobias ME, McGirt MJ, Chaichana KL, Goldstein IM, Kothbauer KF, Epstein F, Jallo GI (2008) Surgical management of long intramedullary spinal cord tumors. Childs Nerv Syst 24:219-223. doi:10.1007/s00381-007-0405-7

20. White Bradley J, Miller Gary M, Layton Kennith F, Krauss William E (2007) Nonenhancing tumors of the spinal cord. Journal of Neurosurgery Spine 7:403-407
